# Supplementary material for: Applicability of microwave induced plasma optical emission spectrometry for wear metal determination in lubricant oil using a multinebulizer
Source: Royal Society of Chemistry journal article supplement (doi:10.1039/d3ja00093a), 2023-01-01
Supplement: d3ja00093a1.pdf [file d3ja00093a1.pdf]

# Applicability of microwave induced plasma optical emission spectrometry for wear metal determination in lubricant oil using a multinebulizer

Sergio J. Abellán-Martín, Miguel Ángel Aguirre and Antonio Canals

Department of Analytical Chemistry and Food Science, University Institute of Materials,  
Faculty of Science, University of Alicante, P.O. Box 99, 03080, Alicante, Spain

## Figures

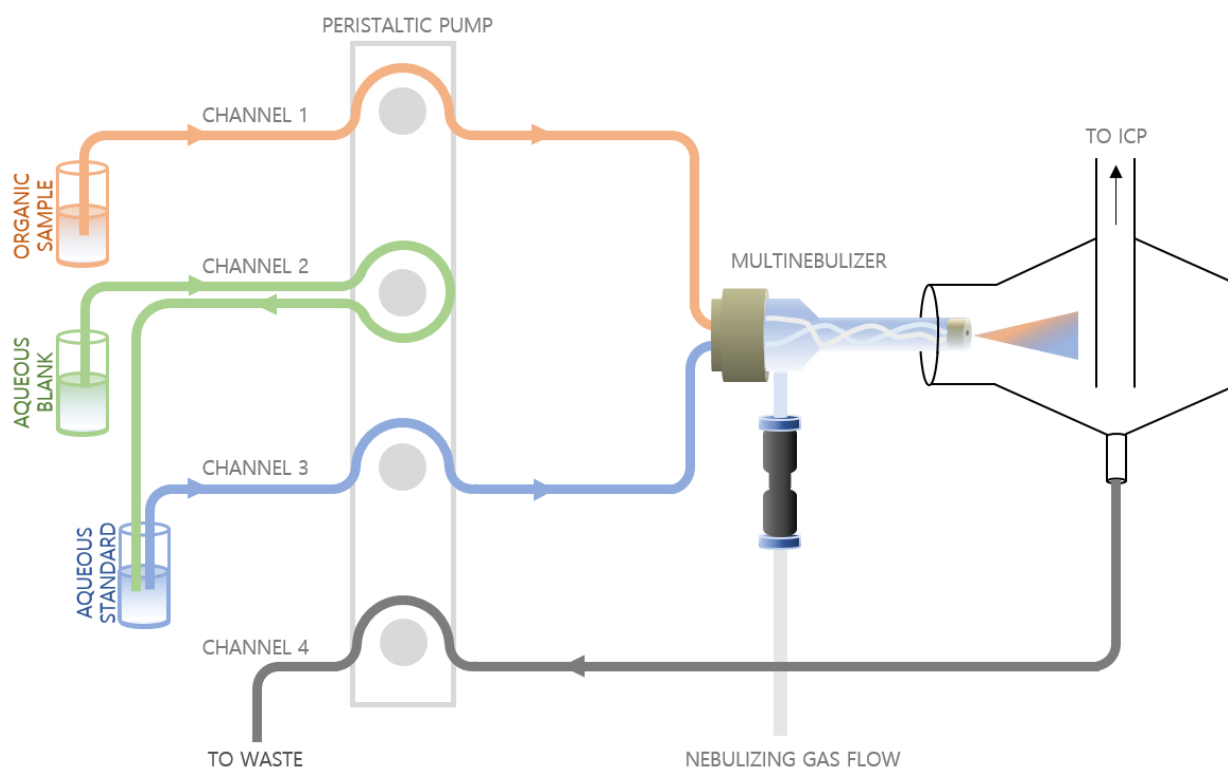

**Figure S1.** Schematic of experimental setup of the different liquid sample introduction using the multinebulizer (MultiNeb®).

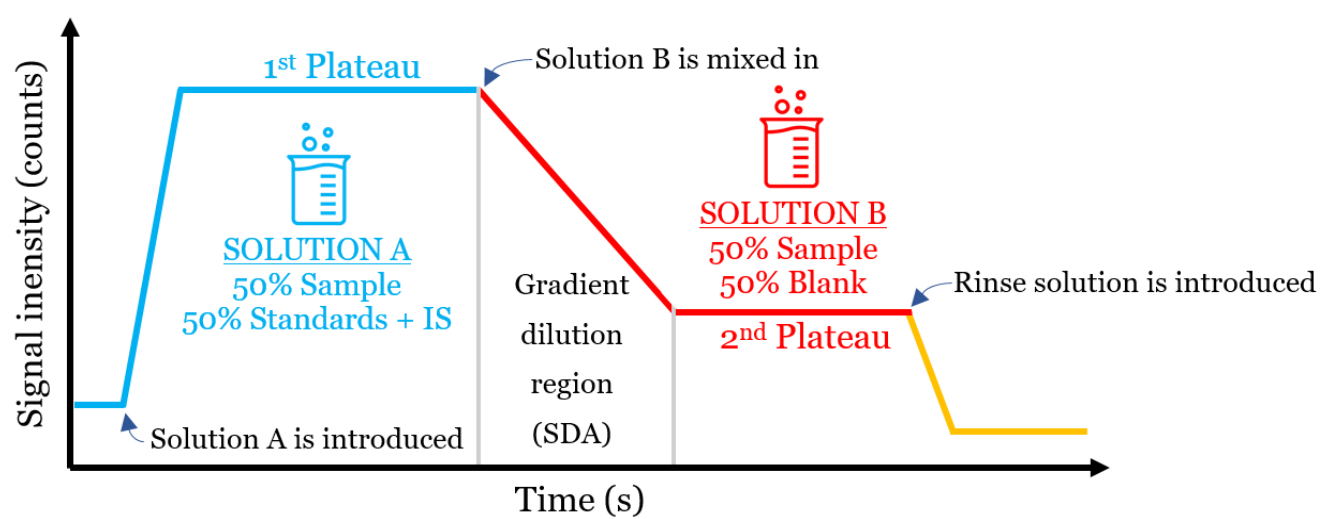

**Figure S2.** Signal variation during an SDA analysis.

A

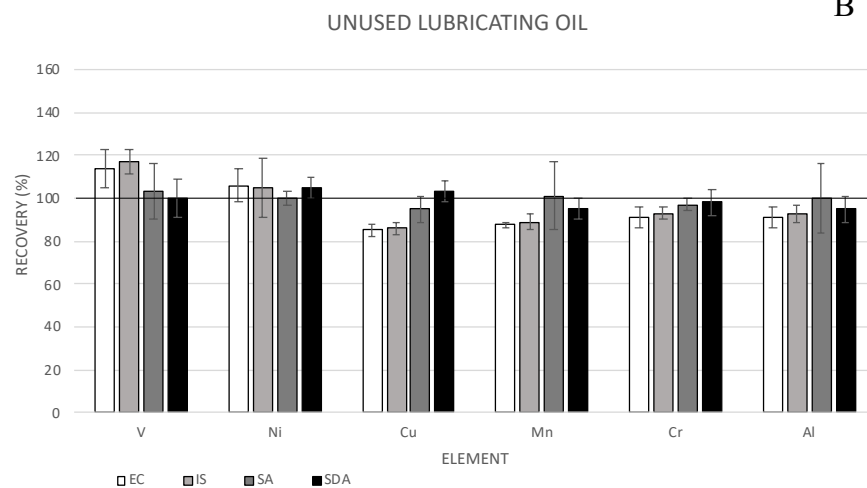

B

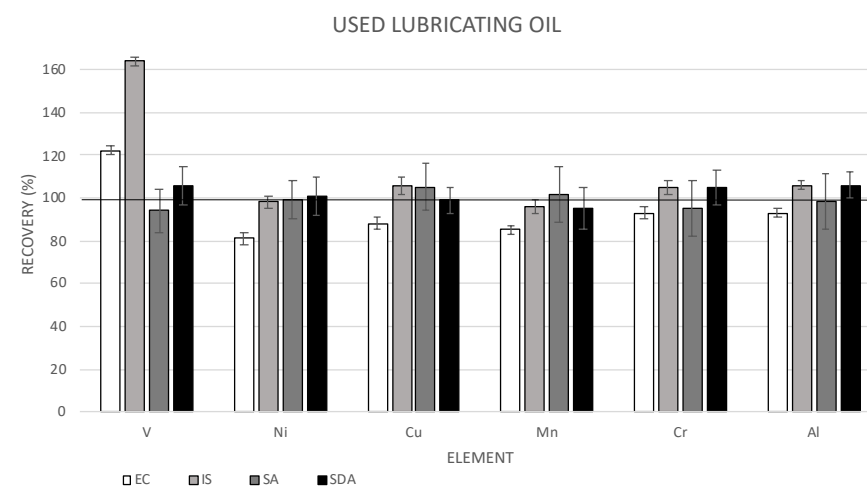

**Figure S3.** Percent recoveries (%) for experiments with lubricating oil samples determined by the MP AES using different calibration strategies. A. Unused lubricating oil. B. Used lubricating oil

## Tables

**Table S1.** *Optimum instrumental parameters used with the MP AES.*

| Instrumental parameter                        | Mode      |            |
|-----------------------------------------------|-----------|------------|
|                                               | Normal    | Continuous |
| Nebulizer gas flow (L min <sup>-1</sup> )     | 0.7       | 0.7        |
| Channel 1 liquid flow (mL min <sup>-1</sup> ) | 0.2       | 0.2        |
| Channel 2 liquid flow (mL min <sup>-1</sup> ) | 0.5       | 0.5        |
| Channel 3 liquid flow (mL min <sup>-1</sup> ) | 0.5       | 0.5        |
| Integration time (s)                          | 3         | 1          |
| Number of replicates                          | 3         | 1          |
| Plasma observation position                   | 0         | 0          |
| Background correction                         | Automatic | Automatic  |

**Table S2.** *Emission lines used in this work.*

| Element | Emission lines (nm) |
|---------|---------------------|
| Al      | 396.152             |
| Cr      | 425.433             |
| Cu      | 324.754             |
| Mn      | 403.076             |
| Ni      | 352.454             |
| V       | 309.311             |
| Y       | 371.029             |

**Table S3.** Critical comparison of the different calibration methodologies evaluated.

| Calibration method | Organic standards | Aqueous standards | Samples <sup>a</sup> | Sample preparation (min) | Analysis (min) | Total time (min) | Sample per hour (h <sup>-1</sup> ) |
|--------------------|-------------------|-------------------|----------------------|--------------------------|----------------|------------------|------------------------------------|
| EC                 | 5                 | 1                 | 4                    | 20                       | 20             | 40               | 6                                  |
| IS                 | 5                 | 1                 | 4                    | 20                       | 20             | 40               | 6                                  |
| SA                 | -                 | 6                 | 4                    | 15                       | 50             | 65               | 4                                  |
| SDA                | -                 | 2                 | 4                    | 5                        | 20             | 25               | 10                                 |

<sup>a</sup> Spiked and non-spiked samples for used and unused lubricating oil.
